# Supplementary material for: Effects of Polymer Conditioner and Nitrogen Fertilizer Application on Nitrogen Absorption and Utilization of Drip-Irrigated Wheat in Arid Areas
Source: MDPI journal article supplement (doi:10.3390/agronomy14020232), 2024-01-23
Supplement: s1 [file s1]

**Table S1.** Experimental design

| Treatment | Material                | Note                                      |
|-----------|-------------------------|-------------------------------------------|
| CK        | No N fertilizer and PPM | ——                                        |
| N300      | 100% N fertilizer       | N: 300 kg/ha                              |
| PN180     | PPM + 60% N fertilizer  | PPM: 12 kg/hm <sup>2</sup> ; N: 180 kg/ha |
| PN240     | PPM + 80% N fertilizer  | PPM: 12 kg/hm <sup>2</sup> ; N: 240 kg/ha |
| PN300     | PPM + 100% N fertilizer | PPM: 12 kg/hm <sup>2</sup> ; N: 300 kg/ha |

**Table S2.** Wheat plant height under different polymer and nitrogen combination treatments.

| Variety | Time  | Treatment | Three-leaf stage | Jointing stage | Flowering stage | Maturity         |
|---------|-------|-----------|------------------|----------------|-----------------|------------------|
|         |       |           |                  |                |                 |                  |
| 2020    |       |           |                  |                |                 |                  |
| XC29    |       | N300      | 13.7±0.1c        | 41.17±0.5a     | 66.24±0.04b     | 80.65±0.05b      |
|         |       | PN300     | 15.3±0.2a        | 41.53±1a       | 70.83±1.67a     | 86.2±2.00a       |
|         |       | PN240     | 14.15±0.1b       | 41.13±0.53a    | 72.08±1.25a     | 87.7±1.50a       |
|         |       | PN180     | 13.7±0.25c       | 40.07±0.87a    | 66.21±0.96b     | 80.65±1.15b      |
|         |       | CK        | 12.3±0.05d       | 40.03±0.97a    | 57.75±1.42c     | 70.5±1.7c        |
| XC38    |       | N300      | 15.55±0.2d       | 49.17±0.7a     | 66.88±1.13ab    | 79.25±0.25b      |
|         |       | PN300     | 17.05±0.3b       | 51.13±1.4a     | 68.54±1.71a     | 83.45±2.05a      |
|         |       | PN240     | 17.42±0.03a      | 42±0.67b       | 67.08±0.08ab    | 81.7±0.1a        |
|         |       | PN180     | 16.05±0.15c      | 41.6±1.73b     | 66.25±0.42ab    | 80.7±0.5ab       |
|         |       | CK        | 15.73±0.03d      | 39.35±1.12c    | 64.58±2.08b     | 76.8±0.6c        |
| 2021    |       |           |                  |                |                 |                  |
| XC29    |       | N300      | 13.79±0.29b      | 42.12±0.85a    | 65.55±0.66b     | 81.19±1.68b      |
|         |       | PN300     | 15.55±0.23a      | 41.81±0.86a    | 72.48±1.47a     | 85.34±0.86a      |
|         |       | PN240     | 14.24±0.43b      | 40.18±0.85b    | 72.56±1.50a     | 86.25±1.81a      |
|         |       | PN180     | 13.79±0.29b      | 39.13±1.01b    | 64.67±1.37b     | 78.7±2.03b       |
|         |       | CK        | 12.67±0.37c      | 39.25±0.78b    | 56.03±1.71c     | 70.97±1.40c      |
| XC38    |       | N300      | 15.91±0.32b      | 49.97±1.03a    | 67.32±1.39ab    | 80.54±1.67a<br>b |
|         |       | PN300     | 17.66±0.53a      | 51.47±1.06a    | 69.00±1.43a     | 79.88±3.32a<br>b |
|         |       | PN240     | 17.54±0.36a      | 40.20±1.67b    | 67.79±1.21ab    | 83.03±1.72a      |
|         |       | PN180     | 16.16±0.49b      | 40.36±1.23b    | 64.28±1.96c     | 81.24±1.68a<br>b |
|         |       | CK        | 15.36±0.39b      | 39.99±0.83b    | 65.01±1.34bc    | 77.31±1.60b      |
|         | V     | ns        | ns               | ns             | ns              | ns               |
|         | T     | **        | **               | **             | **              | **               |
|         | Y     | ns        | ns               | ns             | ns              | ns               |
|         | V×T   | ns        | ns               | ns             | ns              | ns               |
|         | V×Y   | ns        | ns               | ns             | ns              | ns               |
|         | V×T×Y | ns        | ns               | ns             | ns              | ns               |

Note: V: Variety, T: Treatment, Y: Year. Different lowercase letters in the same column indicate significant difference between groups (\*\* p < 0.01, ns: p > 0.05)

**Table S3.** Wheat Biomass under different polymer and nitrogen combination treatments.

| Time<br>Orga<br>ns | Three-leaf stage |           | Jointing stage |           | Flowering stage |           |           | Maturity  |           |           |           |           |
|--------------------|------------------|-----------|----------------|-----------|-----------------|-----------|-----------|-----------|-----------|-----------|-----------|-----------|
|                    | Stem             | Leaf      | Stem           | Leaf      | Stem            | Leaf      | Ear       | Stem      | Leaf      | Ear       | Grain     |           |
| 2020               |                  |           |                |           |                 |           |           |           |           |           |           |           |
| XC29               | N300             | 1672.70±6 | 1198.53±2      | 2354.36±7 | 2480.71±1       | 4818.21±1 | 2215.31±1 | 2089.71±4 | 4297.21±1 | 1852.82±1 | 1713.76±6 | 5942.76±1 |
|                    |                  | 0.92d     | 4.38bc         | 6.70d     | 51.88c          | 75.47c    | 35.63b    | 2.51c     | 40.00c    | 8.52d     | 2.41c     | 52.65c    |
|                    | PN300            | 2114.86±4 | 1195.93±1      | 3339.14±6 | 3102.36±7       | 6057.11±2 | 2632.89±6 | 2728.43±5 | 5425.95±1 | 2741.16±4 | 2062.87±4 | 6537.84±2 |
|                    |                  | 3.02b     | 8.21bc         | 7.92a     | 9.69a           | 20.59b    | 7.63a     | 5.50a     | 37.00b    | 1.73a     | 1.96b     | 13.00b    |
|                    | PN240            | 2406.88±4 | 1172.09±1      | 2433.87±4 | 3038.11±3       | 7071.16±1 | 2240.21±5 | 2646.59±6 | 6760.94±2 | 2071.36±6 | 2515.58±5 | 8964.91±2 |
|                    |                  | 8.96a     | 7.84c          | 9.50cd    | 0.38a           | 43.84a    | 6.56b     | 7.98a     | 46.23a    | 7.48c     | 1.17a     | 30.28a    |
|                    | PN180            | 1966.03±6 | 1354.5±20.     | 2760.76±1 | 2694.48±6       | 6046.90±1 | 2674.66±2 | 2215.49±7 | 3963.97±1 | 2159.97±3 | 1439.75±2 | 5261.16±5 |
|                    |                  | 4.05c     | 62a            | 00.54b    | 9.21b           | 23.00b    | 6.746a    | 2.18b     | 44.36d    | 2.88b     | 9.28d     | 2.61d     |
|                    | CK               | 1531.80±3 | 1240.83±4      | 2562.31±6 | 1938.24±7       | 4759.68±1 | 2211.64±5 | 1497.20±5 | 5337.69±8 | 1281.69±2 | 1702.07±1 | 5011.28±1 |
|                    |                  | 1.16e     | 0.42b          | 4.69c     | 0.59d           | 55.06c    | 5.84b     | 4.52d     | 1.26b     | 6.07e     | 7.02c     | 82.50d    |
| XC38               | N300             | 1866.11±6 | 1464.48±2      | 2765.14±1 | 2493.37±8       | 5679.86±5 | 2865.60±1 | 2191.84±3 | 6029.10±2 | 3340.90±8 | 2200.57±4 | 6925.93±6 |
|                    |                  | 7.96b     | 2.29c          | 00.70c    | 1.23b           | 6.79b     | 04.36c    | 3.36b     | 19.57c    | 5.81b     | 4.76d     | 9.25c     |
|                    | PN300            | 1713.63±4 | 1618.62±2      | 2712.20±9 | 3087.92±1       | 6226.30±1 | 3745.21±5 | 2090.56±7 | 6715.85±2 | 3215.28±4 | 2609.5±53 | 7905.42±7 |
|                    |                  | 3.26c     | 4.64b          | 8.77c     | 00.60a          | 59.93a    | 7.01a     | 6.13b     | 18.80b    | 8.95c     | .08b      | 9.05b     |
|                    | PN240            | 2181.72±3 | 1781.61±3      | 3565.48±3 | 3125.22±1       | 6374.53±1 | 3358.88±6 | 2321.05±8 | 5124.59±1 | 3780±37.8 | 2750.65±5 | 8998.57±2 |
|                    |                  | 3.21a     | 6.24a          | 5.65a     | 13.81a          | 29.67a    | 8.32b     | 4.53a     | 29.39d    | 0a        | 5.95a     | 31.14a    |
|                    | PN180            | 1844.85±2 | 1189.05±2      | 2956.24±2 | 2038.27±6       | 5576.39±2 | 2984.47±2 | 1640.99±4 | 7279.85±1 | 2459.17±3 | 2295.87±4 | 5592.00±1 |
|                    |                  | 8.08b     | 4.19d          | 9.56b     | 6.41c           | 03.09b    | 9.84c     | 1.44c     | 48.09a    | 7.44d     | 6.70c     | 41.20d    |

[illegible]

|           |    |    |    |    |    |    |    |    |    |    |    |
|-----------|----|----|----|----|----|----|----|----|----|----|----|
| V×T       | ns |
| V×Y       | ** | ** | ** | ** | ** | ** | ** | ** | ** | ** | ** |
| V×T×<br>Y | ** | ** | ** | ** | ** | ** | ** | ** | ** | ** | ** |

---

Note: V: Variety, T: Treament, Y: Year. Different lowercase letters in the same column indicate significant difference between groups (\*\* p <0.01, ns: p > 0.05).
